# Supplementary material
Source: publisher figshare collection journal article supplement (https://karger.figshare.com/ndownloader/files/15679400)
Supplement: Supplementary file 1 [file 15679400]

**Supplementary Table 1. Comparison of baseline variables and their postoperative change between men and women**

| **Variables** | **Men**  **(n=87)** | **Women**  **(n=109)** | ***P* value** |
| --- | --- | --- | --- |
| Disease duration, years | 11.6 (6.1) | 12.5 (4.8) | 0.249 |
| Age at onset, years | 45.9 (9.8) | 46.9 (9.2) | 0.455 |
| Age at surgery, years | 57.8 (8.4) | 58.7 (8.0) | 0.512 |
| Baseline UPDRS motor score | 20.0 (12.5) | 21.5 (11.4) | 0.399 |
| Change in UPDRS motor score | 4.7 (11.3) | 4.2 (10.9) | 0.765 |
| Baseline axial score | 5.4 (3.6) | 6.3 (3.5) | 0.101 |
| Change in axial score | 0.6 (3.4) | 0.4 (3.2) | 0.701 |
| Baseline limb bradykinesia score | 7.7 (5.1) | 8.5 (5.1) | 0.265 |
| Change in limb bradykinesia score | 1.3 (4.6) | 1.1 (5.4) | 0.732 |
| Baseline tremor score | 2.0 (3.5) | 2.2 (3.5) | 0.748 |
| Change in tremor score | 1.5 (3.1) | 1.6 (3.3) | 0.789 |
| Baseline dyskinesia score | 4.0 (2.3) | 4.6 (2.0) | 0.076 |
| Change in dyskinesia score | 2.8 (2.6) | 3.5 (2.7) | 0.087 |
| Baseline MMSE score | 27.5 (2.6) | 27.2 (2.6) | 0.508 |
| Change in MMSE score | 0.6 (2.6) | 0.9 (2.8) | 0.416 |
| Baseline BDI score | 17.2 (8.8) | 22.5 (9.7) | <0.001 |
| Change in BDI score | 1.3 (8.9) | 2.1 (10.3) | 0.597 |
| Baseline LEDD, mg | 1452.9 (761.8) | 1295.6 (530.1) | 0.104 |
| Change in LEDD, mg | 964.2 (756.9) | 827.1 (545.3) | 0.157 |

Data are mean (standard deviation).

Abbreviations: BDI=Beck depression inventory; LEDD=levodopa equivalent daily dose; MMSE=Mini-Mental State Examination; UPDRS=Unified Parkinson’s disease rating scale.
